# Supplementary material for: Dynophore-Based Approach in Virtual Screening: A Case of Human DNA Topoisomerase IIα
Source: MDPI journal article supplement (doi:10.3390/ijms222413474), 2021-12-15
Supplement: s1 [file s1]

## **Supporting information:**

### **Dynophore-based approach in virtual screening:**

#### ***A case of human DNA topoisomerase IIa***

Matej Janežič<sup>1,2,†</sup>, Katja Valjavec<sup>1,†</sup>, Kaja Bergant Loboda<sup>1,3</sup>, Barbara Herlah<sup>1,3</sup>, Iza Ogris<sup>1,4</sup>, Mirijam Kozorog<sup>1</sup>, Marjetka Podobnik<sup>1</sup>, Simona Golič Grdadolnik<sup>1</sup>, Gerhard Wolber<sup>5</sup> and Andrej Perdih<sup>1,3\*</sup>

<sup>1</sup>*National Institute of Chemistry, Hajdrihova 19, SI 1000 Ljubljana, Slovenia*

<sup>2</sup>*Laboratory for Structural Bioinformatics, RIKEN Center for Biosystems Dynamics Research, 1-7-22 Suehiro-cho, Tsurumi-ku, Yokohama, Kanagawa, 230-0045, Japan*

<sup>3</sup>*University of Ljubljana, Faculty of Pharmacy, Aškerčeva 7, SI 1000 Ljubljana, Slovenia*

<sup>4</sup>*University of Ljubljana, Faculty of Medicine, Vrazov trg 2, 1000 Ljubljana, Slovenia*

<sup>5</sup>*Institute of Pharmacy, Freie Universität Berlin, Königin Luise-Strasse 2+4, 14195 Berlin, Germany*

<sup>†</sup> *These two authors contributed equally to this work.*

### **Corresponding author:**

National Institute of Chemistry

Hajdrihova 19, SI-1001 Ljubljana, Slovenia

**E-mail :** andrej.perdih@ki.si

**Tel.:** +386-1-4760-376

# 1. Dynophores models of the initial AMP-PNP ligand and triazinone catalytic inhibitor

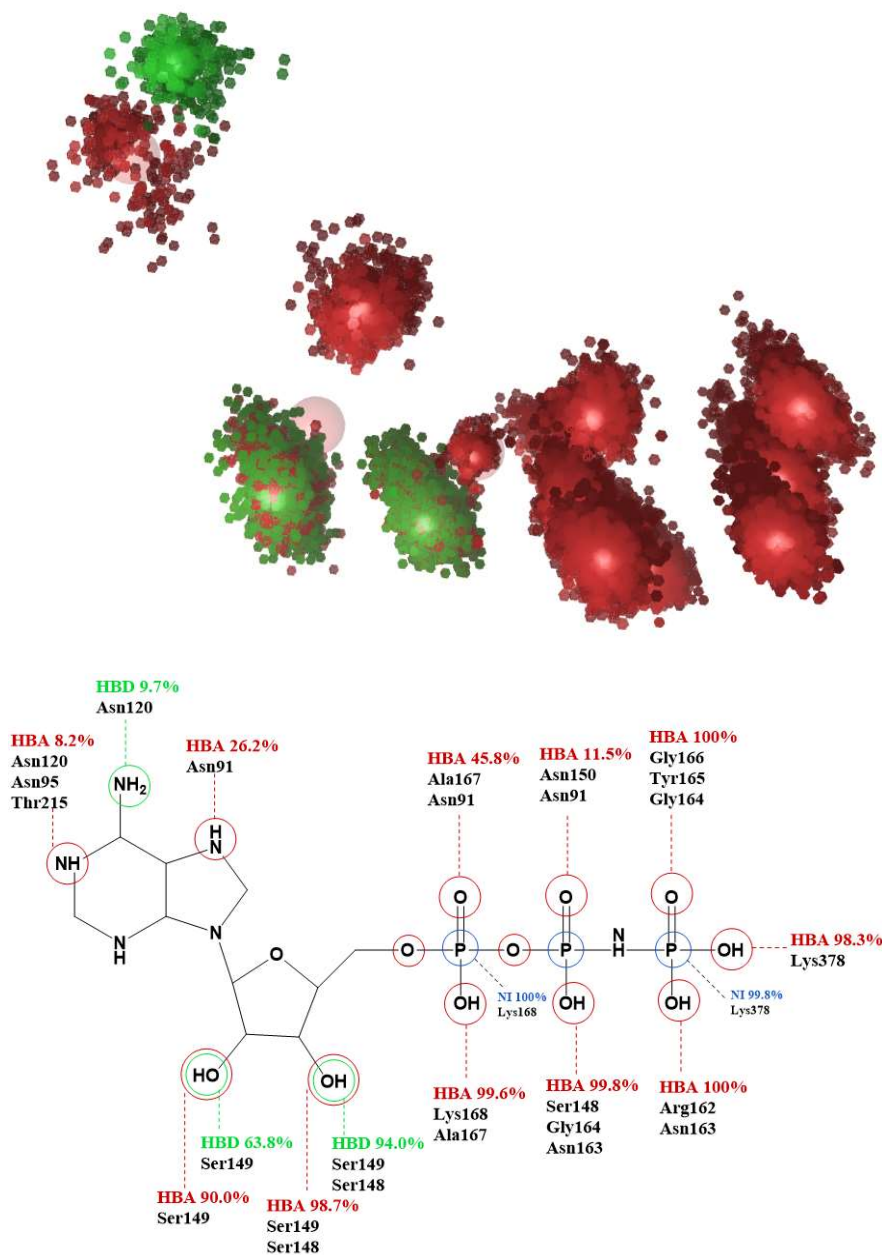

**Figure S1.** (Top) Dynophore model of the AMP-PNP ligand. (Bellow) Detailed interaction pattern of the obtained dynophore model.

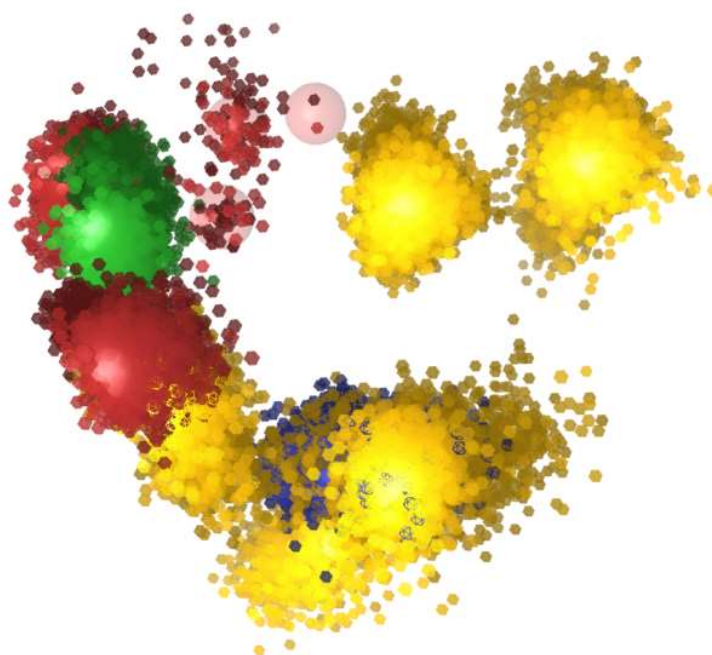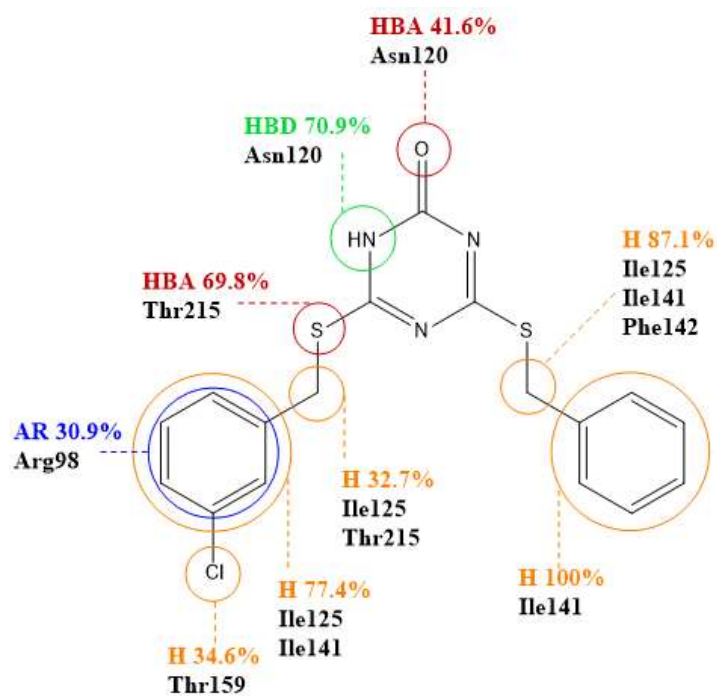

**Figure S2.** (Top) Dynophore model of the triazinone catalytic inhibitor. (Bellow) Detailed interaction pattern of the derived dynophore model.

## 2. Pharmacophore-based virtual screening

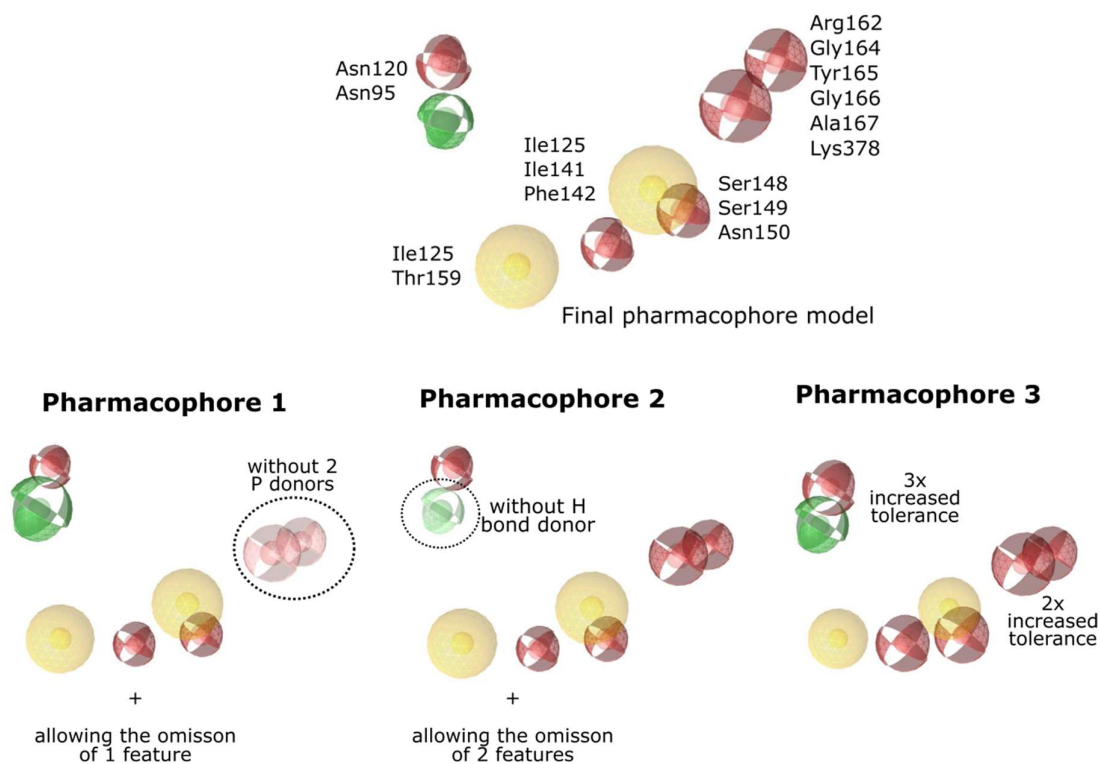

**Figure S3.** Master pharmacophore model derived from the joint dynophore model and the three submodels (pharmacophore models 1-3) that were used in the virtual screening campaign.

### 3. List of assayed compounds and their vendor IDs

**Table S1.** 2D chemical structures and vendor IDs of the assayed hit compounds identified in the pharmacophore-based virtual screening campaign. All compounds were supplied by AnalytiCon Discovery.

| Number | Vendor id | Chemical structure                                                                   |
|--------|-----------|--------------------------------------------------------------------------------------|
| 1      | NP-020233 | 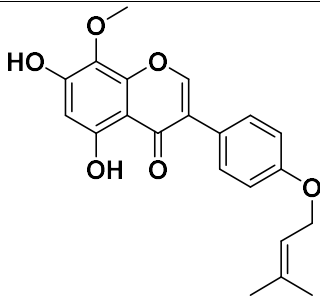   |
| 2      | NP-012878 |   |
| 3      | NP-000008 |  |
| 4      | NP-001581 |  |
| 5      | NP-001009 |  |

|    |           |                                                                                      |
|----|-----------|--------------------------------------------------------------------------------------|
| 6  | NP-002326 | 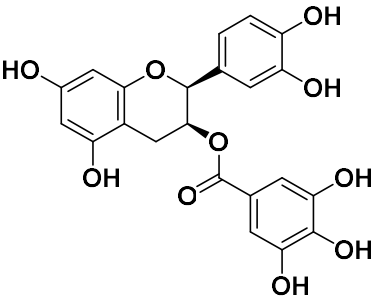   |
| 7  | NP-018721 |    |
| 8  | NP-002406 |   |
| 9  | NP-021038 |  |
| 10 | NP-003468 |  |

|    |           |                                                                                      |
|----|-----------|--------------------------------------------------------------------------------------|
| 11 | NP-015334 | 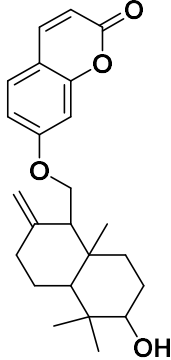   |
| 12 | NP-021204 |    |
| 13 | NP-015244 |   |
| 14 | NP-009245 |  |
| 15 | NP-008285 |  |
| 16 | NP-004128 |  |

|    |              |                                                                                      |
|----|--------------|--------------------------------------------------------------------------------------|
| 16 | NAT12-540804 | 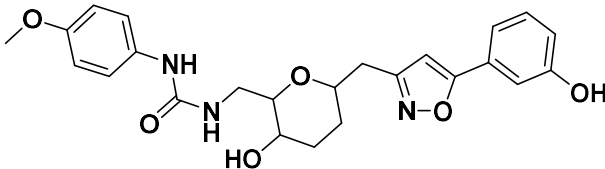   |
| 18 | NAT12-540805 |    |
| 19 | NAT13-337482 |    |
| 20 | NAT13-332258 |   |
| 21 | NAT14-324144 |  |
| 22 | NAT14-324143 |  |



|    |               |                                                                                      |
|----|---------------|--------------------------------------------------------------------------------------|
| 23 | NAT16-353105  | 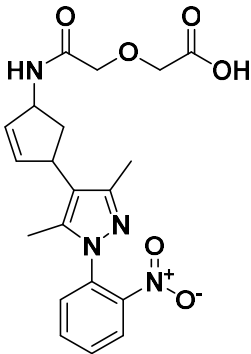   |
| 24 | NAT19-353700  |    |
| 25 | NAT19-353596  |    |
| 26 | NAT217-567834 |   |
| 27 | NAT225-569709 |  |
| 28 | NAT231-583844 |  |

|    |               |  |
|----|---------------|--|
| 29 | NAT231-583923 |  |
| 30 | NAT231-584163 |  |
| 31 | NAT231-584167 |  |
| 32 | NAT231-584289 |  |
| 33 | NAT231-584332 |  |
| 34 | NAT231-584350 |  |

|    |              |                                                                                      |
|----|--------------|--------------------------------------------------------------------------------------|
| 35 | NAT28-409157 | 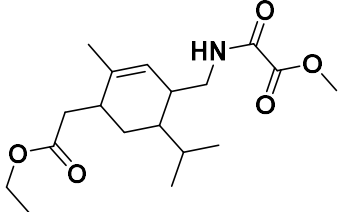   |
| 36 | NAT31-456614 |    |
| 37 | NAT31-460146 |    |
| 38 | NAT33-501383 |   |
| 39 | NAT33-501388 |  |
| 40 | NAT36-504794 |  |
| 41 | NAT36-530837 |  |

|    |              |                                                                                      |
|----|--------------|--------------------------------------------------------------------------------------|
| 42 | NAT36-530845 | 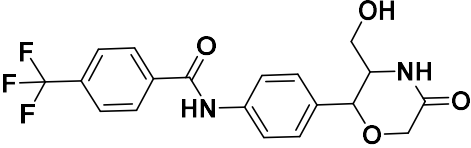   |
| 43 | NAT36-530847 |    |
| 44 | NAT39-500350 |    |
| 45 | NAT39-500427 |   |
| 46 | NAT49-563038 |  |
| 47 | NAT5-250415  |  |
| 48 | NAT50-555957 |  |
| 49 | NAT9-312632  |  |

#### 4. Results of the human topo II $\alpha$ decatenation assay

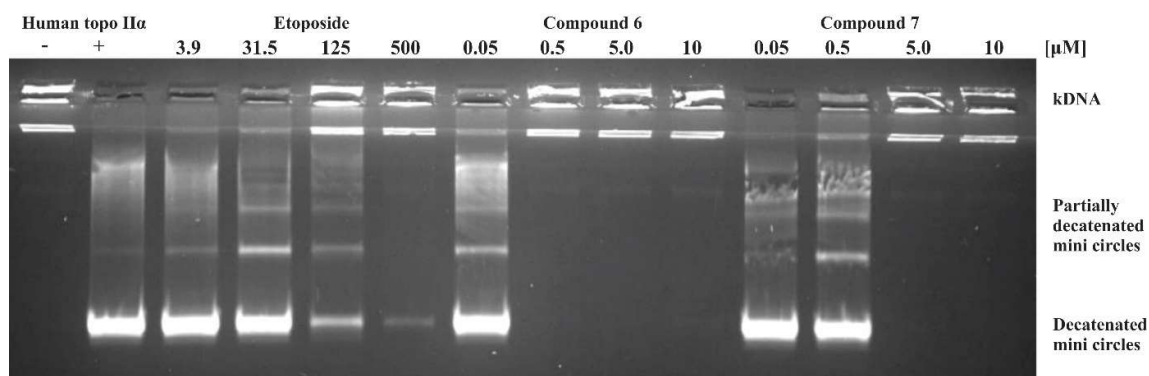

**Figure S4.** Results of the second run of the of the human topo II $\alpha$  decatenation assay for compounds **6**, **7**, and etoposide. The assay was performed at 4 different concentrations (0.05, 0.5, 5.0 and 10  $\mu$ M) of compound **6**, and **7**. For the reference compound etoposide, concentrations 3.9, 31.5, 125, 500  $\mu$ M were used.

**Table S2.** Detailed data of the decatenation assay catalysed by the human topo II $\alpha$  for compounds **6** and **7**, and positive control etoposide. Results are represented as % of the decatenated kDNA.

| Compound                    | % Decatenated<br>Assay 1 |      |      |     | % Decatenated<br>Assay 2 |      |      |     | % Decatenated<br>Average |      |      |     |
|-----------------------------|--------------------------|------|------|-----|--------------------------|------|------|-----|--------------------------|------|------|-----|
| Concentration<br>( $\mu$ M) | 3.9                      | 31.5 | 125  | 500 | 3.9                      | 31.5 | 125  | 500 | 3.9                      | 31.5 | 125  | 500 |
| Etoposide                   | 100.0                    | 92.4 | 28.9 | 4.9 | 99.9                     | 87.4 | 25.9 | 5.2 | 100                      | 89.9 | 27.4 | 5.0 |
| Concentration<br>( $\mu$ M) | 0.05                     | 0.5  | 5.0  | 10  | 0.05                     | 0.5  | 5.0  | 10  | 0.05                     | 0.5  | 5.0  | 10  |
| Compound <b>6</b>           | 41.1                     | 0.15 | 0    | 0   | 88.3                     | 0    | 0    | 0   | 64.7                     | 0.08 | 0    | 0   |
| Concentration<br>( $\mu$ M) | 0.05                     | 0.5  | 5.0  | 10  | 0.05                     | 0.5  | 5.0  | 10  | 0.05                     | 0.5  | 5.0  | 10  |
| Compound <b>7</b>           | 98.0                     | 98.6 | 0    | 0   | 99.2                     | 89.1 | 0    | 0   | 98.6                     | 93.9 | 0    | 0   |

## 5. Results of the human topo II $\alpha$ cleavage assay

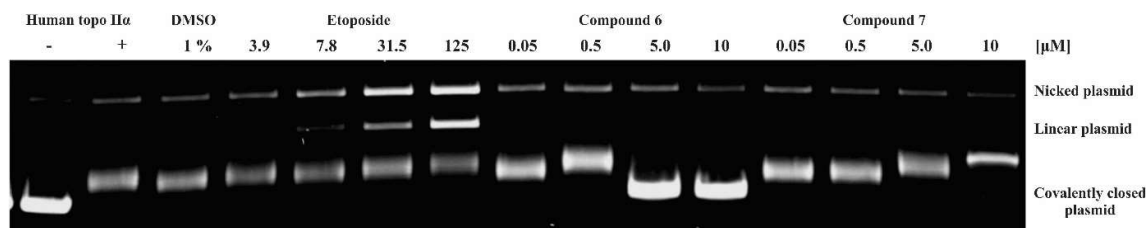

**Figure S5.** Results of the second run of the topoisomerase II $\alpha$  cleavage assay. The assay was performed at 4 different concentrations 0.05, 0.5, 5.0 and 10  $\mu$ M of compound **6** and **7** and at 3.9, 7.8, 31.5, 125  $\mu$ M concentrations of the reference compound etoposide. The linear band was measured as a % of the total DNA, with the 100% representing the amount of DNA in track 1 (DNA alone).

**Table S3.** Percent of the linear DNA determined in the topoisomerase II $\alpha$  cleavage assay for compounds **6** and **7** and etoposide as a reference molecule (all measured at four concentrations).

| Compound                       | % Linear<br>Assay 1 | % Linear<br>Assay 2 | % Linear<br>Average |
|--------------------------------|---------------------|---------------------|---------------------|
| DNA alone                      | 0                   | 0                   | <b>0</b>            |
| DNA + topo II                  | 0                   | 0                   | <b>0</b>            |
| DNA + topo II + DMSO           | 0                   | 1.80                | <b>0.90</b>         |
| Etoposide 3.9 $\mu$ M          | 10.31               | 5.52                | <b>7.92</b>         |
| Etoposide 7.8 $\mu$ M          | 13.40               | 10.07               | <b>11.73</b>        |
| Etoposide 31.5 $\mu$ M         | 21.43               | 16.90               | <b>19.16</b>        |
| Etoposide 125 $\mu$ M          | 35.87               | 31.47               | <b>33.67</b>        |
| Compound <b>6</b> 0.05 $\mu$ M | 0                   | 0                   | <b>0</b>            |
| Compound <b>6</b> 0.5 $\mu$ M  | 0                   | 0                   | <b>0</b>            |
| Compound <b>6</b> 5.0 $\mu$ M  | 0                   | 0                   | <b>0</b>            |
| Compound <b>6</b> 10 $\mu$ M   | 0                   | 0                   | <b>0</b>            |
| Compound <b>7</b> 0.05 $\mu$ M | 0                   | 0                   | <b>0</b>            |
| Compound <b>7</b> 0.5 $\mu$ M  | 0                   | 0                   | <b>0</b>            |
| Compound <b>7</b> 5.0 $\mu$ M  | 0                   | 0                   | <b>0</b>            |
| Compound <b>7</b> 10 $\mu$ M   | 0                   | 0                   | <b>0</b>            |

## 6. Results of the unwinding assay

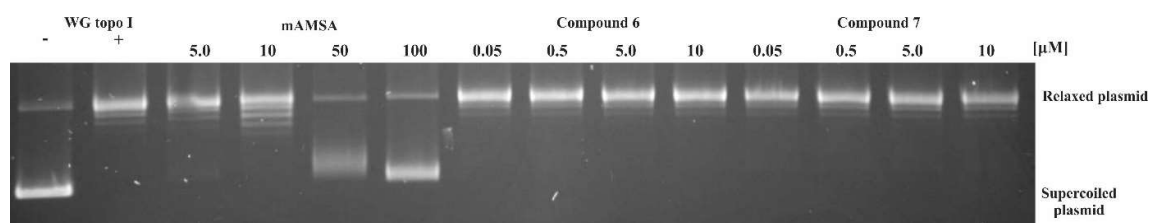

**Figure S6.** Results of the second run of the unwinding assay. The assay was performed at four different concentrations of compounds **6** and **7** (0.05, 0.5, 5.0 and 10  $\mu\text{M}$ ) and of the positive control intercalator mAMSA (5.0, 10, 50, 100  $\mu\text{M}$ ).

## 7. Results of the human topo II $\alpha$ ATPase activity

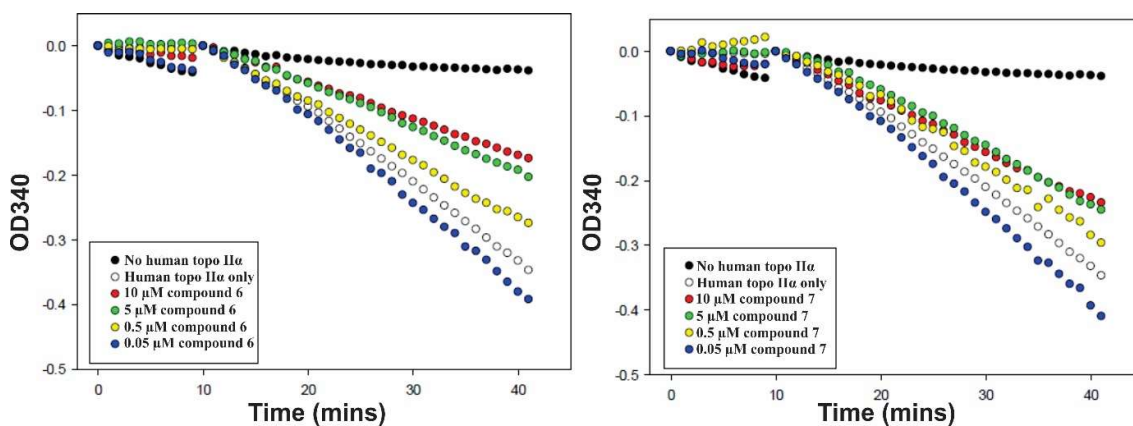

**Figure S7.** Representative graphs of the human topo II $\alpha$  ATPase assay for compounds **6** (left) and **7** (right). The reaction was performed at four concentrations (0.05, 0.5, 5.0 and 10  $\mu$ M) for each investigated compound.

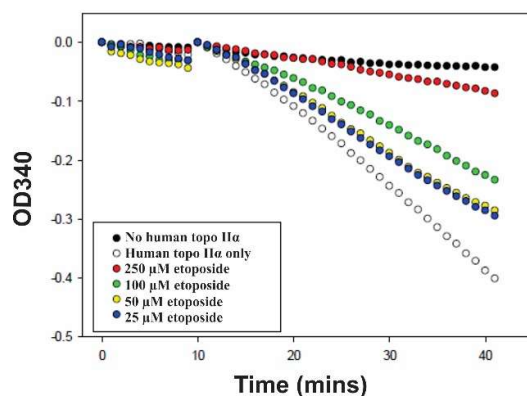

**Figure S8.** Representative graph of the performed ATPase assay for the etoposide reference molecule. The reaction was performed at four concentrations (25, 50, 100, 250  $\mu$ M).



**Table S4.** Results of the human topo II $\alpha$  ATPase assay for compounds **6** and **7**, and etoposide given as the % activity which were calculated as follows: The spectrophotometer produces an output as change in OD340 with time. After 40 or 60 minutes the blank reading (no enzyme) was subtracted from the readings for each compound and divided by the positive reading (no inhibitor, 100% activity) minus the blank to give the percentage ATPase activity for each compound.

|                             | Rate ATPase activity (μmol/min)         |      |       |      |                                         |      |       |       |
|-----------------------------|-----------------------------------------|------|-------|------|-----------------------------------------|------|-------|-------|
|                             | Run 1                                   |      |       |      | Run 2                                   |      |       |       |
| No human topo IIα           | 0.342                                   |      | 0.218 |      | 0.342                                   |      | 0.612 |       |
|                             | 0.769                                   |      |       |      | 0.28                                    |      | 0.363 |       |
| Human topo IIα only         | 4.08                                    |      | 4.38  |      | 3.63                                    |      | 4.03  |       |
|                             | 4.12                                    |      | 3.94  |      | 3.86                                    |      | 2.87  |       |
|                             | Average no human topo IIα               |      | 0.443 |      | Average no human topo IIα               |      | 0.399 |       |
|                             | Average human topo IIα only             |      | 4.13  |      | Average human topo IIα only             |      | 3.60  |       |
|                             | Percentage ATPase activity of compounds |      |       |      | Percentage ATPase activity of compounds |      |       |       |
|                             | Concentration (μM) Run 1                |      |       |      | Concentration (μM) Run 2                |      |       |       |
| [Etoposide]                 | 250                                     | 100  | 50    | 25   | 250                                     | 100  | 50    | 25    |
| Percentage                  | 14.9                                    | 55.1 | 69.3  | 71.8 | 19.9                                    | 50.1 | 70.0  | 87.9  |
| [cpd 6]                     | 10                                      | 5    | 0.5   | 0.05 | 10                                      | 5    | 0.5   | 0.05  |
| Percentage                  | 58.7                                    | 48.8 | 60.0  | 89.2 | 43.9                                    | 53.3 | 76.3  | 114.6 |
| [cpd 7]                     | 10                                      | 5    | 0.5   | 0.05 | 10                                      | 5    | 0.5   | 0.05  |
| Percentage                  | 53.2                                    | 71.8 | 81.4  | 96.4 | 63.4                                    | 66.9 | 83.6  | 120.4 |
| Average Percentage Activity |                                         |      |       |      |                                         |      |       |       |
| [Etoposide] μM              | 250                                     |      | 100   |      | 50                                      |      | 25    |       |
| Percentage activity         | 17.4                                    |      | 52.6  |      | 69.7                                    |      | 79.9  |       |
| [cpd 6] μM                  | 10                                      |      | 5     |      | 0.5                                     |      | 0.05  |       |
| Percentage activity         | 56.0                                    |      | 60.3  |      | 68.2                                    |      | 101.9 |       |
| [cpd 7] μM                  | 10                                      |      | 5     |      | 0.5                                     |      | 0.05  |       |
| Percentage activity         | 58.3                                    |      | 69.4  |      | 82.5                                    |      | 108.4 |       |

## 8. Results of the competitive cleavage assay for compound 6

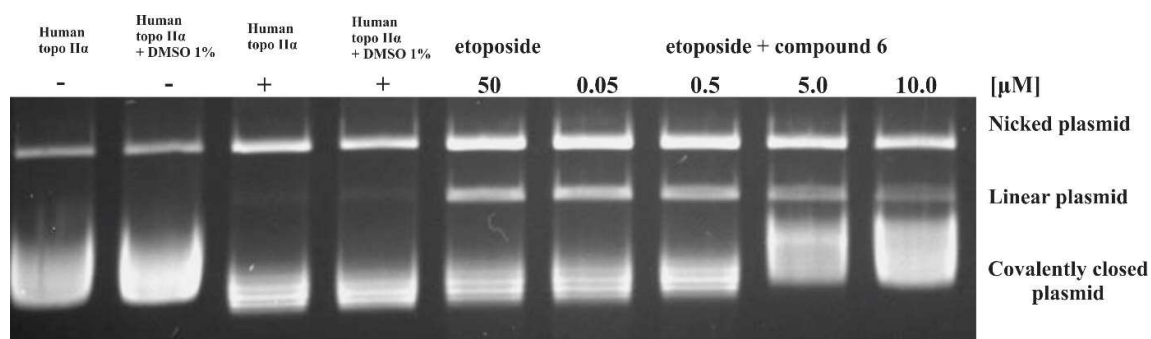

**Figure S9.** Results of the second run of the topoisomerase II $\alpha$  competitive cleavage assay. The assay was performed at 4 different concentrations of compound **6** (0.05, 0.5, 5.0 and 10  $\mu$ M) in the presence of etoposide at the 50  $\mu$ M concentration.

**Table S5.** Results of the competitive cleavage assay for compound **6**, tested at four concentrations: 0.05, 0.5, 5.0, 10  $\mu$ M in the presence of 50  $\mu$ M etoposide.

| Compound                         | % Linear Assay 1 | % Linear Assay 2 | % Linear Average |
|----------------------------------|------------------|------------------|------------------|
| DNA alone                        | 0                | 0                | <b>0</b>         |
| DNA + topo II $\alpha$           | 1.58             | 2.08             | <b>1.83</b>      |
| DNA + topo II $\alpha$ + DMSO    | 1.25             | 2.37             | <b>1.81</b>      |
| + Etoposide 50 $\mu$ M           | 22.25            | 17.33            | <b>19.79</b>     |
| + Compound <b>6</b> 0.05 $\mu$ M | 19.03            | 17.70            | <b>18.37</b>     |
| + Compound <b>6</b> 0.5 $\mu$ M  | 16.41            | 16.50            | <b>16.45</b>     |
| + Compound <b>6</b> 5.0 $\mu$ M  | 19.61            | 8.86             | <b>14.24</b>     |
| + Compound <b>6</b> 10 $\mu$ M   | 6.51             | 4.74             | <b>5.63</b>      |

## 9. Results of the competitive ATPase assay for compound 6

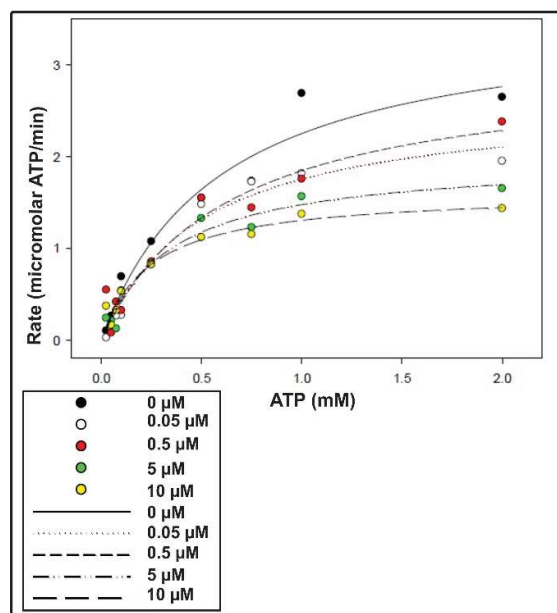

**Figure S10.** Representative graph of the competitive ATPase assay for compound 6, performed at 4 different concentrations of compound 6 (0.05, 0.5, 5.0 and 10 μM), and 9 different ATP concentrations (0.025, 0.05, 0.075, 0.1, 0.25, 0.5, 0.75, 1, 2 mM).

## 10.HR-MS analysis of active compounds

The HR-MS analysis were performed at the Centre for Mass spectroscopy, Josef Stefan Institute, Ljubljana, Slovenia.

### Elemental Composition Report

Page 1

#### Single Mass Analysis

Tolerance = 10.0 PPM / DBE: min = -1.5, max = 50.0

Element prediction: Off

Number of isotope peaks used for i-FIT = 3

Monoisotopic Mass, Even Electron Ions

471 formula(e) evaluated with 5 results within limits (all results (up to 1000) for each mass)

Elements Used:

C: 0-100 H: 0-100 N: 0-20 O: 0-20

Kaja Bergant

NP-000008 neg 30 (1.219) Cm (29:31-3:10)

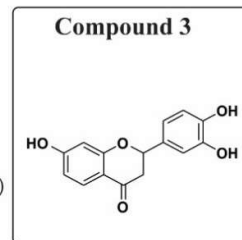

1: TOF MS ES-  
1.97e+005

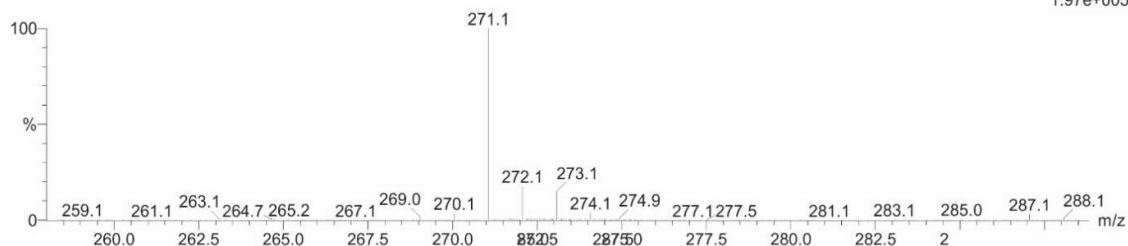

Minimum: -1.5  
Maximum: 5.0 10.0 50.0

| Mass     | Calc. Mass | mDa  | PPM  | DBE  | i-FIT | i-FIT (Norm) | Formula      |
|----------|------------|------|------|------|-------|--------------|--------------|
| 271.0613 | 271.0612   | 0.1  | 0.4  | 3.5  | 617.8 | 2.8          | H7 N12 O6    |
| 271.0606 |            | 0.7  | 2.6  | 10.5 | 615.9 | 0.9          | C15 H11 O5   |
| 271.0620 |            | -0.7 | -2.6 | 15.5 | 616.0 | 1.0          | C16 H7 N4 O  |
| 271.0625 |            | -1.2 | -4.4 | 8.5  | 618.4 | 3.3          | C H3 N16 O2  |
| 271.0638 |            | -2.5 | -9.2 | 2.5  | 617.3 | 2.3          | C4 H11 N6 O8 |

## Elemental Composition Report

Page 1

### Single Mass Analysis

Tolerance = 10.0 PPM / DBE: min = -1.5, max = 50.0

Element prediction: Off

Number of isotope peaks used for i-FIT = 3

Monoisotopic Mass, Even Electron Ions

1539 formula(e) evaluated with 20 results within limits (all results (up to 1000) for each mass)

Elements Used:

C: 0-100 H: 0-100 N: 0-20 O: 0-20

Kaja Bergant

NP-001009 neg 41 (1.680) Cm (41:42)

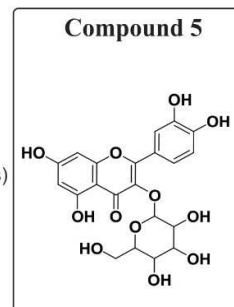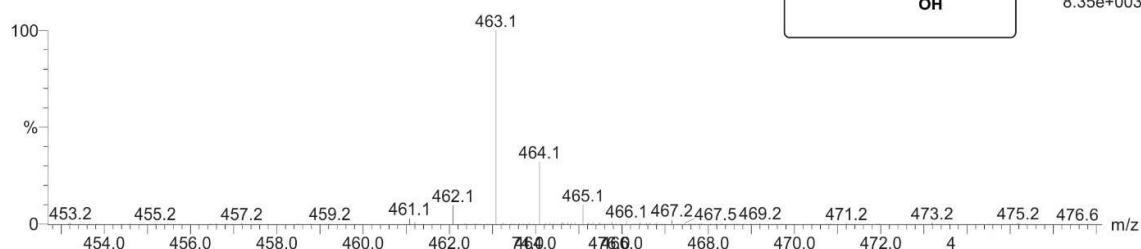

Minimum: -1.5  
Maximum: 5.0 10.0 50.0

| Mass     | Calc. Mass | mDa  | PPM  | DBE  | i-FIT | i-FIT (Norm) | Formula        |
|----------|------------|------|------|------|-------|--------------|----------------|
| 463.0873 | 463.0871   | 0.2  | 0.4  | 30.5 | 176.1 | 1.2          | C34 H11 N2 O   |
| 463.0876 | -0.3       | -0.6 | 23.5 |      | 178.8 | 3.9          | C19 H7 N14 O2  |
| 463.0877 | -0.4       | -0.9 | 12.5 |      | 177.7 | 2.8          | C21 H19 O12    |
| 463.0868 | 0.5        | 1.1  | 0.5  |      | 182.0 | 7.0          | C5 H19 N8 O17  |
| 463.0882 | -0.9       | -1.9 | 5.5  |      | 181.9 | 6.9          | C6 H15 N12 O13 |
| 463.0863 | 1.0        | 2.2  | 18.5 |      | 178.9 | 3.9          | C18 H11 N10 O6 |
| 463.0890 | -1.7       | -3.7 | 17.5 |      | 177.6 | 2.6          | C22 H15 N4 O8  |
| 463.0855 | 1.8        | 3.9  | 6.5  |      | 183.0 | 8.0          | C2 H11 N18 O11 |
| 463.0895 | -2.2       | -4.8 | -0.5 |      | 181.0 | 6.1          | C9 H23 N2 O19  |
| 463.0895 | -2.2       | -4.8 | 10.5 |      | 181.8 | 6.8          | C7 H11 N16 O9  |
| 463.0850 | 2.3        | 5.0  | 13.5 |      | 179.0 | 4.1          | C17 H15 N6 O10 |
| 463.0850 | 2.3        | 5.0  | 24.5 |      | 180.1 | 5.1          | C15 H3 N20     |
| 463.0903 | -3.0       | -6.5 | 22.5 |      | 177.6 | 2.6          | C23 H11 N8 O4  |
| 463.0841 | 3.2        | 6.9  | 1.5  |      | 183.3 | 8.3          | C H15 N14 O15  |
| 463.0908 | -3.5       | -7.6 | 4.5  |      | 180.9 | 6.0          | C10 H19 N6 O15 |
| 463.0908 | -3.5       | -7.6 | 15.5 |      | 181.7 | 6.7          | C8 H7 N20 O5   |
| 463.0836 | 3.7        | 8.0  | 19.5 |      | 180.2 | 5.2          | C14 H7 N16 O4  |
| 463.0836 | 3.7        | 8.0  | 8.5  |      | 179.3 | 4.3          | C16 H19 N2 O14 |
| 463.0831 | 4.2        | 9.1  | 26.5 |      | 176.1 | 1.1          | C29 H11 N4 O3  |
| 463.0917 | -4.4       | -9.5 | 27.5 |      | 177.8 | 2.8          | C24 H7 N12     |

# Elemental Composition Report

Page 1

## Single Mass Analysis

Tolerance = 10.0 PPM / DBE: min = -1.5, max = 50.0

Element prediction: Off

Number of isotope peaks used for i-FIT = 3

Monoisotopic Mass, Even Electron Ions

1419 formula(e) evaluated with 15 results within limits (all results (up to 1000) for each mass)

Elements Used:

C: 0-100 H: 0-100 N: 0-20 O: 0-20

Kaja Bergant

NP-002326 15 (0.609) Cm (13:16)

## Compound 6

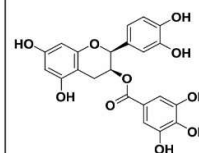

1: TOF MS ES+  
7.97e+003

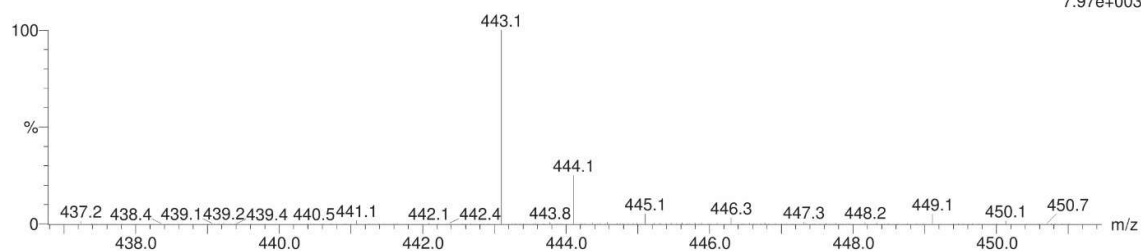

Minimum: -1.5  
Maximum: 5.0 10.0 50.0

| Mass     | Calc. Mass | mDa  | PPM  | DBE  | i-FIT | i-FIT (Norm) | Formula        |
|----------|------------|------|------|------|-------|--------------|----------------|
| 443.0984 | 443.0983   | 0.1  | 0.2  | 6.5  | 218.4 | 13.2         | C7 H15 N12 O11 |
|          | 443.0978   | 0.6  | 1.4  | 13.5 | 205.2 | 0.0          | C22 H19 O10    |
|          | 443.0978   | 0.6  | 1.4  | 24.5 | 212.6 | 7.5          | C20 H7 N14     |
|          | 443.0992   | -0.8 | -1.8 | 18.5 | 209.1 | 3.9          | C23 H15 N4 O6  |
|          | 443.0997   | -1.3 | -2.9 | 0.5  | 215.4 | 10.3         | C10 H23 N2 O17 |
|          | 443.0997   | -1.3 | -2.9 | 11.5 | 218.1 | 12.9         | C8 H11 N16 O7  |
|          | 443.0970   | 1.4  | 3.2  | 1.5  | 218.7 | 13.6         | C6 H19 N8 O15  |
|          | 443.0965   | 1.9  | 4.3  | 19.5 | 211.3 | 6.2          | C19 H11 N10 O4 |
|          | 443.1005   | -2.1 | -4.7 | 23.5 | 212.4 | 7.2          | C24 H11 N8 O2  |
|          | 443.1010   | -2.6 | -5.9 | 16.5 | 217.9 | 12.8         | C9 H7 N20 O3   |
|          | 443.1010   | -2.6 | -5.9 | 5.5  | 216.0 | 10.8         | C11 H19 N6 O13 |
|          | 443.0956   | 2.8  | 6.3  | 7.5  | 221.3 | 16.1         | C3 H11 N18 O9  |
|          | 443.0951   | 3.3  | 7.4  | 14.5 | 211.9 | 6.8          | C18 H15 N6 O8  |
|          | 443.1023   | -3.9 | -8.8 | 10.5 | 216.2 | 11.1         | C12 H15 N10 O9 |
|          | 443.0943   | 4.1  | 9.3  | 2.5  | 222.0 | 16.8         | C2 H15 N14 O13 |

# Elemental Composition Report

Page 1

## Single Mass Analysis

Tolerance = 10.0 PPM / DBE: min = -1.5, max = 50.0

Element prediction: Off

Number of isotope peaks used for i-FIT = 3

Monoisotopic Mass, Even Electron Ions

2314 formula(e) evaluated with 29 results within limits (all results (up to 1000) for each mass)

Elements Used:

C: 0-100 H: 0-100 N: 0-20 O: 0-20

Kaja Bergant

NP-018721 21 (0.868) Cm (18:21)

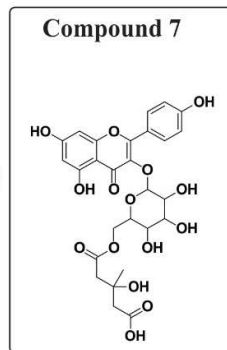

1: TOF MS ES+  
3.22e+004

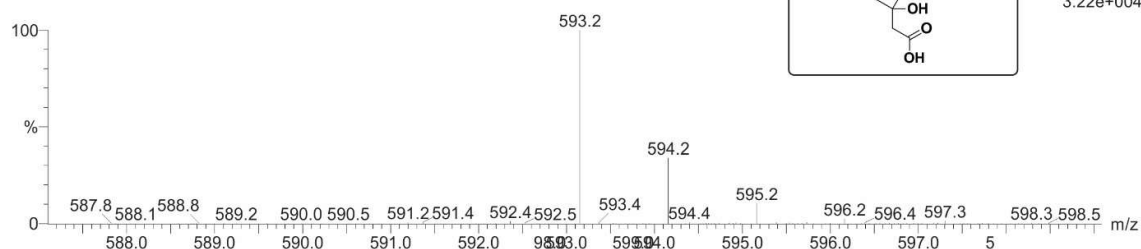

Minimum: -1.5  
Maximum: 5.0 10.0 50.0

| Mass     | Calc. Mass | mDa  | PPM  | DBE  | i-FIT | i-FIT (Norm) | Formula         |
|----------|------------|------|------|------|-------|--------------|-----------------|
| 593.1505 | 593.1506   | -0.1 | -0.2 | 13.5 | 227.0 | 1.7          | C27 H29 O15     |
| 593.1506 | -0.1       | -0.2 | 24.5 |      | 229.2 | 4.0          | C25 H17 N14 O5  |
| 593.1501 | 0.4        | 0.7  | 31.5 |      | 229.0 | 3.8          | C40 H21 N2 O4   |
| 593.1511 | -0.6       | -1.0 | 6.5  |      | 233.1 | 7.9          | C12 H25 N12 O16 |
| 593.1498 | 0.7        | 1.2  | 1.5  |      | 233.4 | 8.2          | C11 H29 N8 O20  |
| 593.1515 | -1.0       | -1.7 | 36.5 |      | 229.8 | 4.6          | C41 H17 N6      |
| 593.1493 | 1.2        | 2.0  | 19.5 |      | 229.2 | 3.9          | C24 H21 N10 O9  |
| 593.1520 | -1.5       | -2.5 | 29.5 |      | 229.6 | 4.4          | C26 H13 N18 O   |
| 593.1520 | -1.5       | -2.5 | 18.5 |      | 226.9 | 1.7          | C28 H25 N4 O11  |
| 593.1525 | -2.0       | -3.4 | 11.5 |      | 233.0 | 7.8          | C13 H21 N16 O12 |
| 593.1485 | 2.0        | 3.4  | 7.5  |      | 234.6 | 9.3          | C8 H21 N18 O14  |
| 593.1480 | 2.5        | 4.2  | 14.5 |      | 229.5 | 4.3          | C23 H25 N6 O13  |
| 593.1479 | 2.6        | 4.4  | 25.5 |      | 231.1 | 5.9          | C21 H13 N20 O3  |
| 593.1533 | -2.8       | -4.7 | 23.5 |      | 227.5 | 2.3          | C29 H21 N8 O7   |
| 593.1474 | 3.1        | 5.2  | 32.5 |      | 229.3 | 4.1          | C36 H17 N8 O2   |
| 593.1538 | -3.3       | -5.6 | 5.5  |      | 231.8 | 6.5          | C16 H29 N6 O18  |
| 593.1538 | -3.3       | -5.6 | 16.5 |      | 232.9 | 7.6          | C14 H17 N20 O8  |
| 593.1471 | 3.4        | 5.7  | 2.5  |      | 234.9 | 9.6          | C7 H25 N14 O18  |
| 593.1542 | -3.7       | -6.2 | 35.5 |      | 230.0 | 4.7          | C45 H21 O2      |
| 593.1543 | -3.8       | -6.4 | -1.5 |      | 236.4 | 11.1         | C H25 N18 O19   |
| 593.1466 | 3.9        | 6.6  | 20.5 |      | 231.3 | 6.1          | C20 H17 N16 O7  |
| 593.1466 | 3.9        | 6.6  | 9.5  |      | 230.1 | 4.8          | C22 H29 N2 O17  |
| 593.1547 | -4.2       | -7.1 | 28.5 |      | 228.5 | 3.3          | C30 H17 N12 O3  |
| 593.1461 | 4.4        | 7.4  | 27.5 |      | 228.5 | 3.2          | C35 H21 N4 O6   |
| 593.1552 | -4.7       | -7.9 | 10.5 |      | 231.6 | 6.4          | C17 H25 N10 O14 |
| 593.1453 | 5.2        | 8.8  | 15.5 |      | 231.6 | 6.4          | C19 H21 N12 O11 |
| 593.1560 | -5.5       | -9.3 | 22.5 |      | 226.9 | 1.6          | C33 H25 N2 O9   |
| 593.1448 | 5.7        | 9.6  | 33.5 |      | 230.0 | 4.7          | C32 H13 N14     |
| 593.1448 | 5.7        | 9.6  | 22.5 |      | 227.4 | 2.2          | C34 H25 O10     |

## 11. Molecular docking calculations

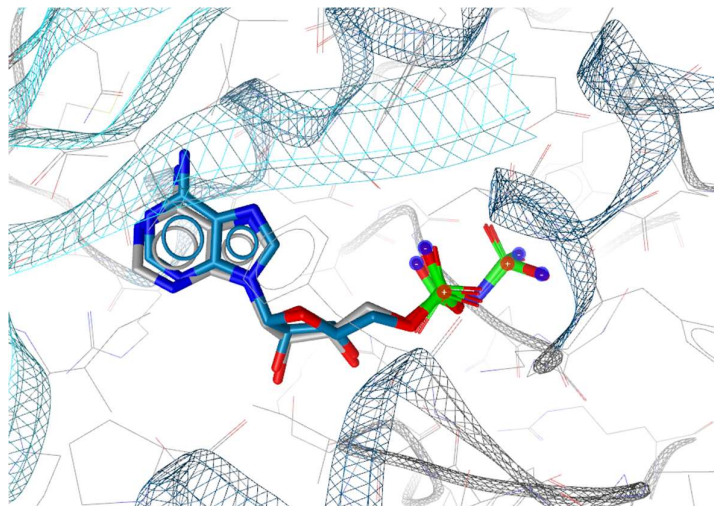

**Figure S11.** Comparison of the docked AMP-PNP ligand (gray) and its x-ray conformation (blue) in the ATP binding site of the human topo II $\alpha$  (PDB: 1ZXM, chain A). A RMSD of 0.9 Å between heavy atoms of both poses was determined.



## 12. Partial charges and Atoms Types of the simulated Compound 6

**Table S6.** Atom types and partial atomic charges for compound **6** generated using General Amber Force Field (gaff).

| Name | Type | q         | Name | Type | q         |
|------|------|-----------|------|------|-----------|
| O5   | oh   | -0.661984 | H9   | ha   | 0.275341  |
| H4   | ho   | 0.470859  | H8   | ha   | 0.23262   |
| C5   | ca   | 0.234378  | C9   | ca   | -0.50207  |
| C16  | ca   | -0.315206 | C22  | c3   | 0.019471  |
| H12  | ha   | 0.176945  | H17  | hc   | 0.051225  |
| C6   | ca   | 0.37889   | H18  | hc   | 0.051225  |
| O6   | oh   | -0.641321 | C21  | c3   | 0.270078  |
| H5   | ho   | 0.471277  | H16  | h1   | 0.067092  |
| C17  | ca   | -0.309891 | O10  | os   | -0.593503 |

|            |    |           |            |    |           |
|------------|----|-----------|------------|----|-----------|
| <b>H13</b> | ha | 0.218938  | <b>C19</b> | c  | 1.045.982 |
| <b>C18</b> | ca | -0.242514 | <b>O9</b>  | o  | -0.662182 |
| <b>H14</b> | ha | 0.171712  | <b>C10</b> | ca | -0.254459 |
| <b>C11</b> | ca | 0.031387  | <b>C15</b> | ca | -0.322011 |
| <b>C20</b> | c3 | 0.236837  | <b>H11</b> | ha | 0.232831  |
| <b>H15</b> | h1 | 0.072468  | <b>C14</b> | ca | -0.322011 |
| <b>O1</b>  | os | -0.431101 | <b>H10</b> | ha | 0.232831  |
| <b>C1</b>  | ca | 0.510958  | <b>C3</b>  | ca | 0.374428  |
| <b>C12</b> | ca | -0.670155 | <b>O3</b>  | oh | -0.61413  |
| <b>C8</b>  | ca | 0.603985  | <b>H2</b>  | ho | 0.446264  |
| <b>O8</b>  | oh | -0.640153 | <b>C2</b>  | ca | 0.062867  |
| <b>H7</b>  | ho | 0.449332  | <b>O2</b>  | oh | -0.590765 |
| <b>C13</b> | ca | -0.618825 | <b>H1</b>  | ho | 0.415796  |
| <b>C7</b>  | ca | 0.570294  | <b>C4</b>  | ca | 0.374428  |
| <b>O7</b>  | oh | -0.634612 | <b>O4</b>  | oh | -0.61413  |
| <b>H6</b>  | ho | 0.44402   | <b>H3</b>  | ho | 0.446264  |

### 13. Analysis of the MD trajectory of the topo II $\alpha$ - compound 6 complex

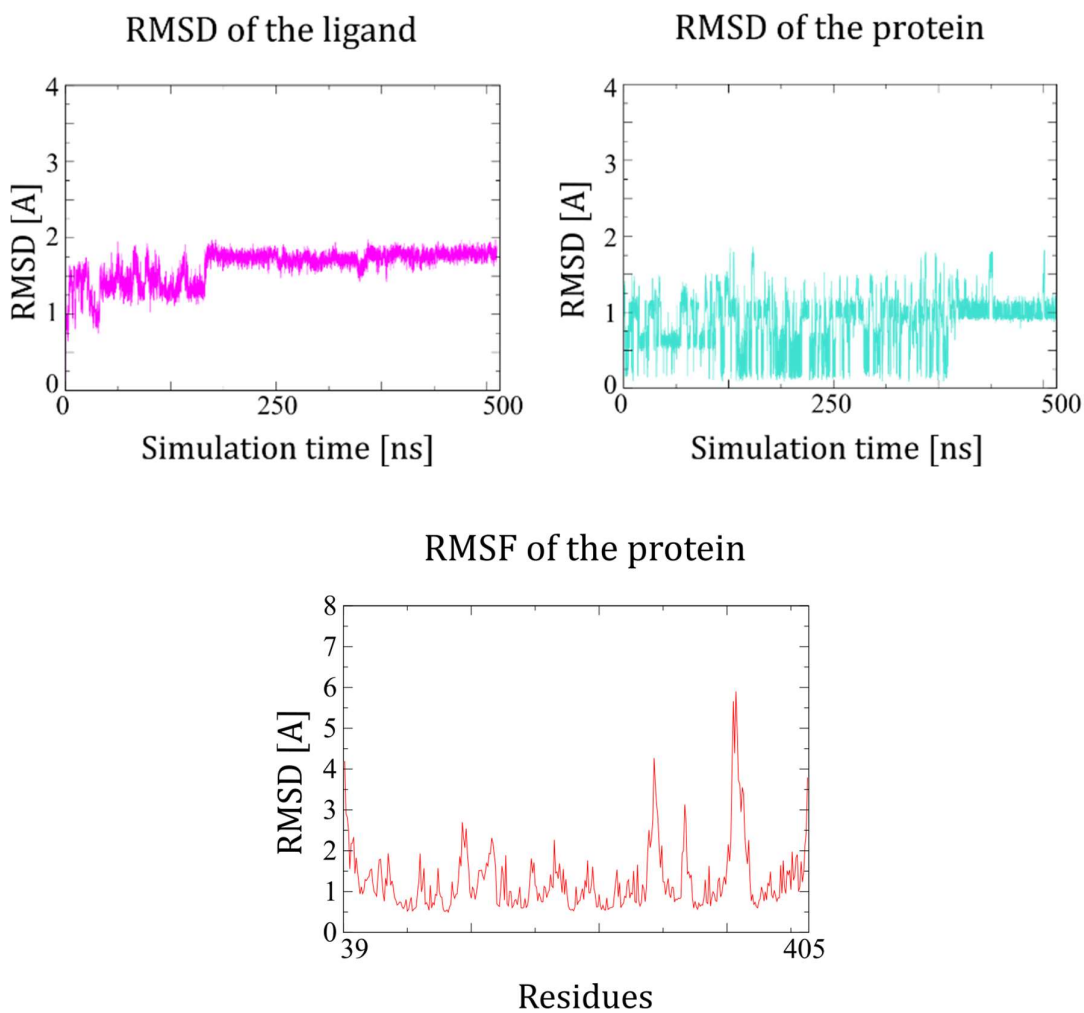

**Figure S12.** (left) Time-dependant RMSD of the ligand **6** (right), Time-dependant RMSD of the protein (C $\alpha$  atoms) and (bellow) RMSF graph of the protein during the MD simulation.

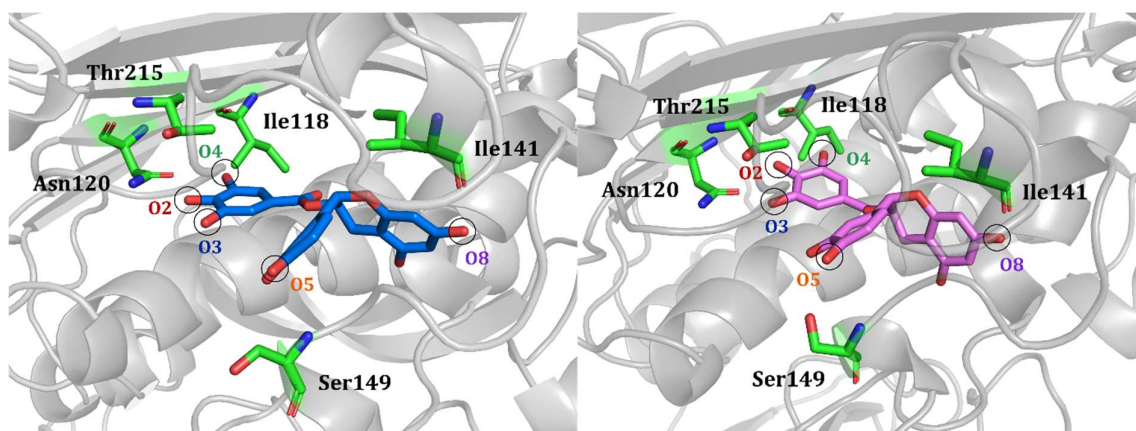

**Figure S13.** Positional shift of ligand 6 in the ATP binding site during the MD simulation. (Left) Position during the first 150 ns. (Right) Position from 150 ns onward.
